# Supplementary material for: Light on the sustainable preparation of aryl-cored dibromides
Source: publisher site journal article supplement (doi:10.3762/bjoc.20.95), 2024-05-14

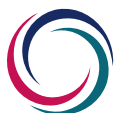

## Supporting Information

for

### Light on the sustainable preparation of aryl-cored dibromides

Fabrizio Roncaglia, Alberto Ughetti, Nicola Porcelli, Biagio Anderlini, Andrea Severini  
and Luca Rigamonti

*Beilstein J. Org. Chem.* **2024**, *20*, 1076–1087. [doi:10.3762/bjoc.20.95](https://doi.org/10.3762/bjoc.20.95)

### Additional figures and tables and copies of spectra

**Table S1** – Preparation of **3a** from **3**, using variable H<sub>2</sub>O<sub>2</sub> amounts.

| entry | H <sub>2</sub> O <sub>2</sub> 35 wt% (mL) | unconverted <b>3</b> | <b>3am</b> (%) | <b>3a</b> (%) | <b>3at</b> (%) |
|-------|-------------------------------------------|----------------------|----------------|---------------|----------------|
| 1     | 1.0                                       | 9                    | 11             | 80            | -              |
| 2     | 1.2                                       | 8                    | 8              | 84            | -              |
| 3     | 1.5                                       | 5                    | 3              | 86            | -              |
| 4     | 2.0                                       | -                    | 1              | 90            | 6              |
| 5     | 2.2                                       | -                    | 1              | 90            | 9              |

Reaction conditions: *p*-xylene (531 mg, 5 mmol), H<sub>2</sub>O (2.0 mL), HBr (48 wt% aqueous solution, 1.24 mL, 11 mmol), Osram white LED lamp 6.5 W, H<sub>2</sub>O<sub>2</sub> (35 wt% aqueous solution, dropped at 1.0 mL/h by a syringe pump), CH<sub>2</sub>Cl<sub>2</sub> (0.5 mL).

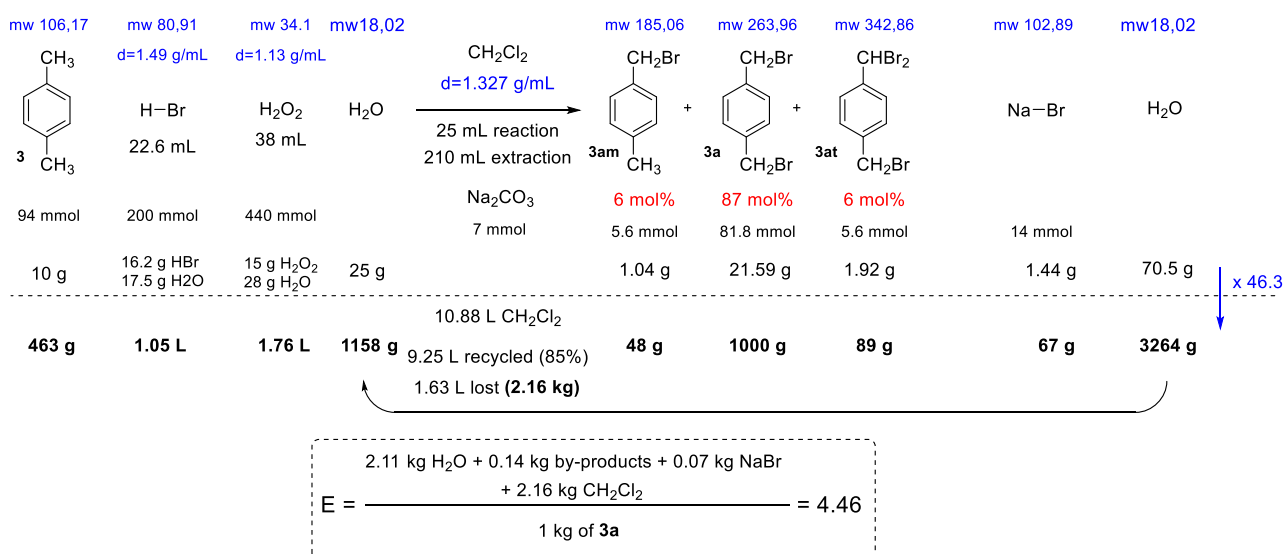

**Figure S1.** Evaluation of E factor for the conversion (benzylic bromination) of **3** into **3a**, based on the 10-gram scale procedure: In a 150 mL Schlenk tube with screw cap, equipped with a magnetic stirring bar, substrate (10 g, 94 mmol, 1.0 equiv), CH<sub>2</sub>Cl<sub>2</sub> (25 mL), H<sub>2</sub>O (25 mL) and HBr (48 wt % aqueous solution, *d* = 1.49 g/mL, 22.6 mL, 200 mmol, 2.13 equiv) were inserted. The mixture was kept under stirring at rt and irradiated with a LED lightbulb placed at 10 cm from the side of the reaction tube. Aqueous H<sub>2</sub>O<sub>2</sub> (35 wt % solution, *d* = 1.13 g/mL, 38 mL, 440 mmol, 4.7 equiv) was added over 2 h using a syringe pump, through a small PTFE tube inserted through the side arm of the Schlenk. After the addition was over, the mixture was irradiated under stirring for 1 h and 30 min. Once the mixture was neutralized with solid Na<sub>2</sub>CO<sub>3</sub> (0.74 g, 7 mmol) the product was extracted with CH<sub>2</sub>Cl<sub>2</sub> (3 × 70 mL). The combined organic layers were concentrated to dryness to give the crude product as white-yellowish solid in 87% yield. The solvent recovery efficiency was set at 85 wt %.

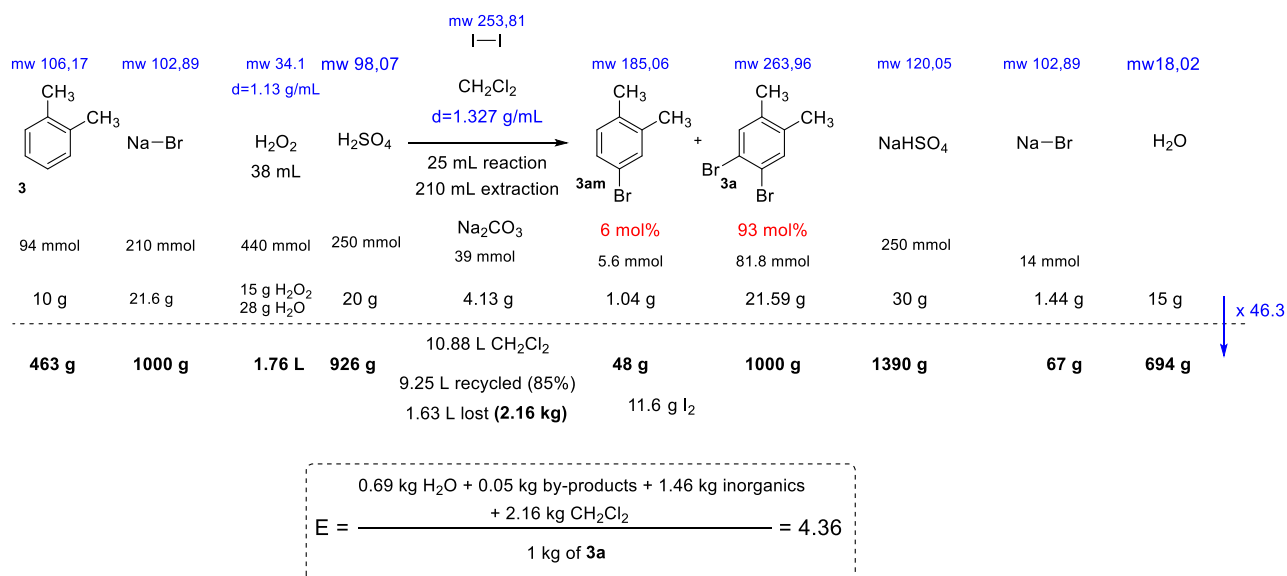

**Figure S2.** Evaluation of E factor for the conversion (ring bromination) of **1** into **1b**, based on the 10-gram scale procedure: In a 100 mL round-bottom flask, equipped with a magnetic stirring bar, substrate (10 g, 94 mmol, 1.0 equiv), H<sub>2</sub>SO<sub>4</sub> (96 wt %, 20.0 g, 235 mmol, 2.4 equiv), I<sub>2</sub> (0.25 g, 1 mol %) and CH<sub>2</sub>Cl<sub>2</sub> (25 mL) were inserted. The flask, kept under stirring at rt, was light-shielded with aluminium foil and a water-cooled condenser was installed on its top. A solution of NaBr (2.88 g, 28 mmol, 2.33 equiv) in H<sub>2</sub>O<sub>2</sub> (35 wt % aqueous solution, 38 mL, 440 mmol, 4.7 equiv) was added to the mixture over 20 min with a syringe pump, through a PTFE tube inserted in the top of the condenser. The system was then refluxed for 48 h. Once cooled to RT, the reaction mixture was neutralized with solid Na<sub>2</sub>CO<sub>3</sub> (4.13 g, 39 mmol), and the product was extracted with CH<sub>2</sub>Cl<sub>2</sub> (3 × 70 mL). The combined organic layers were concentrated to dryness to give the crude product as brown solid in 93% yield. The solvent recovery efficiency was set at 85 wt %.

### <sup>1</sup>H NMR spectra (400 MHz, 298 K, CDCl<sub>3</sub>)

All the synthesized compounds correspond to well-known structures. In the following, the <sup>1</sup>H NMR spectra of the extracted reaction mixture are reported. For compound **3a**, the spectrum for the crystallized product is reported. Compound **4a** from the raw reaction mixture was strongly contaminated by aryl bromides by-products (see main text). The reported spectrum is that obtained after the first chromatographic purification. A purer version is obtainable after a second purification, resulting in 42% yield (see main text).

**1,2-Bis(bromomethyl)benzene (1a):**  $^1\text{H NMR}$  (400 MHz, 298 K,  $\text{CDCl}_3$ ):  $\delta$  7.37 (m, 2H), 7.31 (m, 2H), 4.67 (s, 4H) ppm.

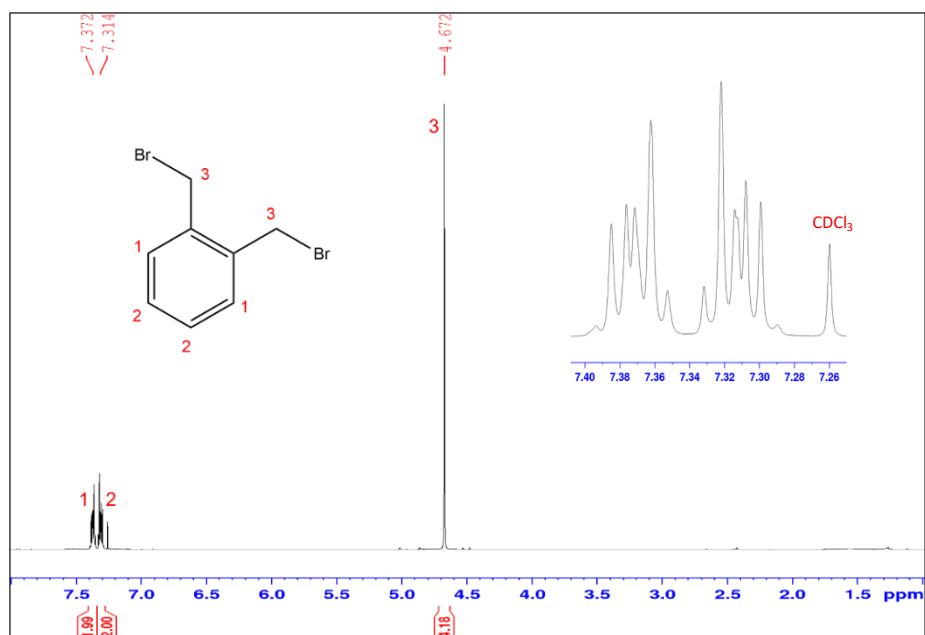

**1,2-Dibromo-4,5-dimethylbenzene (1b):**  $^1\text{H NMR}$  (400 MHz, 298 K,  $\text{CDCl}_3$ )  $\delta$  7.37 (s, 2H), 2.19 (s, 6H) ppm.

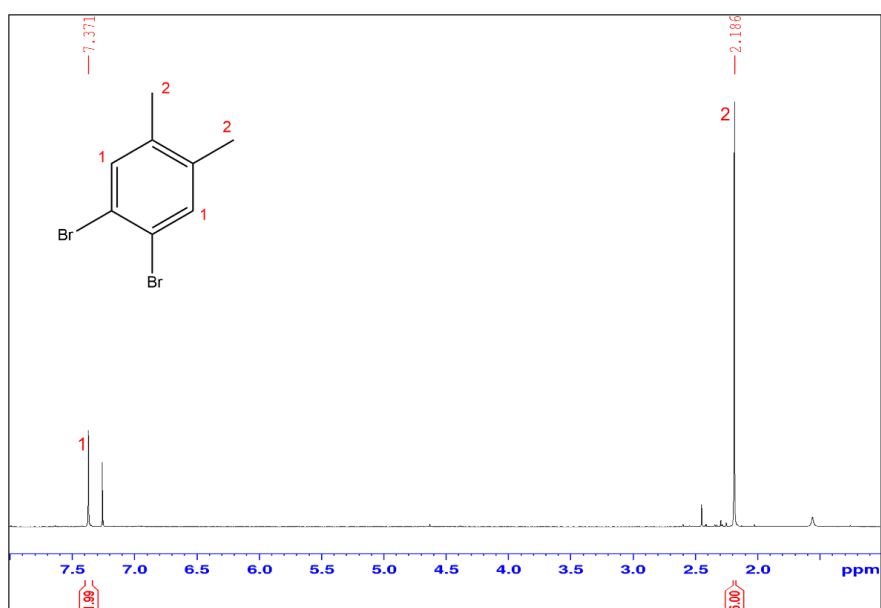

**1,2-Dibromo-4,5-bis(bromomethyl)benzene (1c):**  $^1\text{H}$  NMR (400 MHz, 298 K,  $\text{CDCl}_3$ ):  $\delta$  7.62 (m, 2H), 4.53 (s, 4H) ppm.

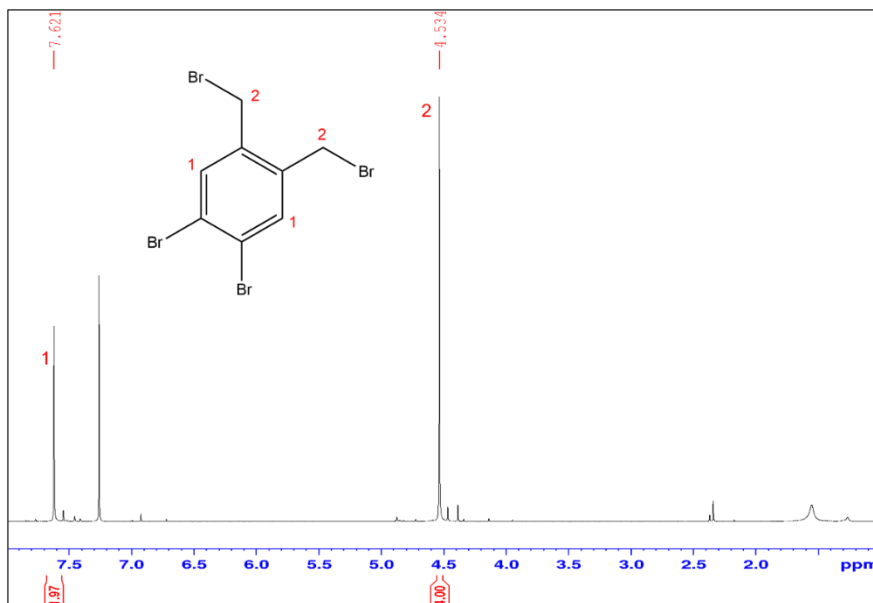

**1,3-Bis(bromomethyl)benzene (2a):**  $^1\text{H}$  NMR (400 MHz, 298 K,  $\text{CDCl}_3$ ):  $\delta$  7.42 (m, 1H), 7.33 (m, 1H), 7.32 (m, 2H), 4.48 (s, 4H) ppm.

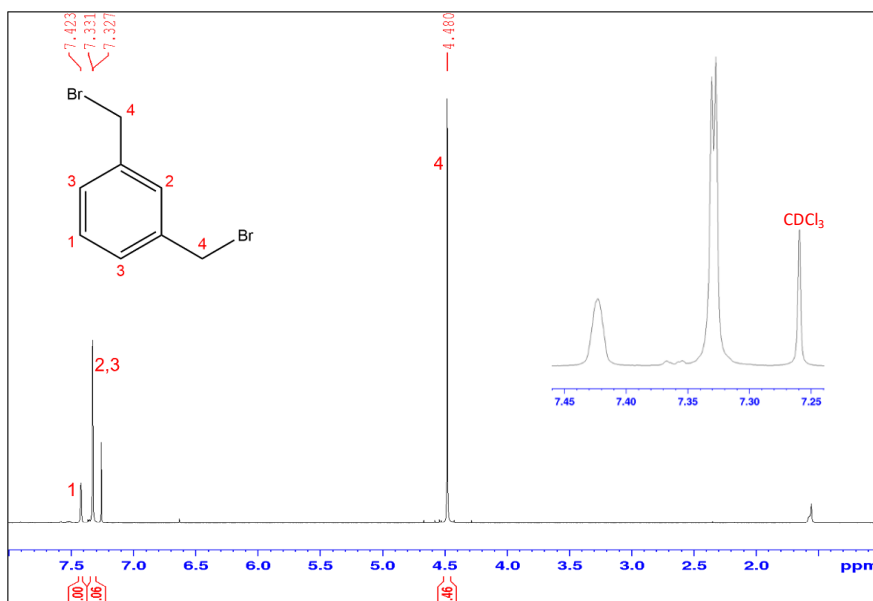

**1,5-Dibromo-2,4-dimethylbenzene (2b):**  $^1\text{H NMR}$  (400 MHz, 298 K,  $\text{CDCl}_3$ ):  $\delta$  7.68 (s, 1H), 7.10 (s, 1H), 2.31 (s, 6H) ppm.

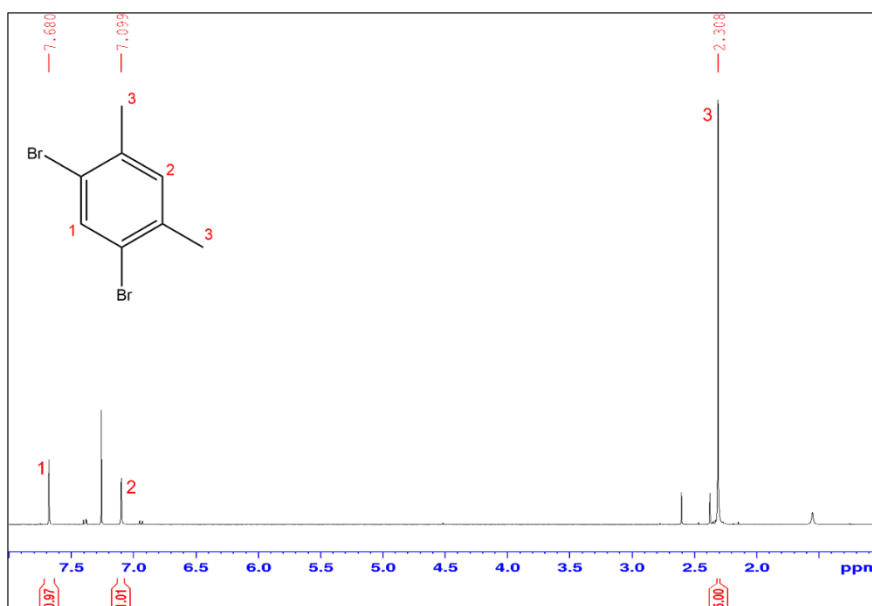

**1,4-Bis(bromomethyl)benzene (3a)** (crystallized from toluene):  $^1\text{H NMR}$  (400 MHz, 298 K,  $\text{CDCl}_3$ ):  $\delta$  7.37 (s, 4H), 4.48 (s, 4H) ppm.

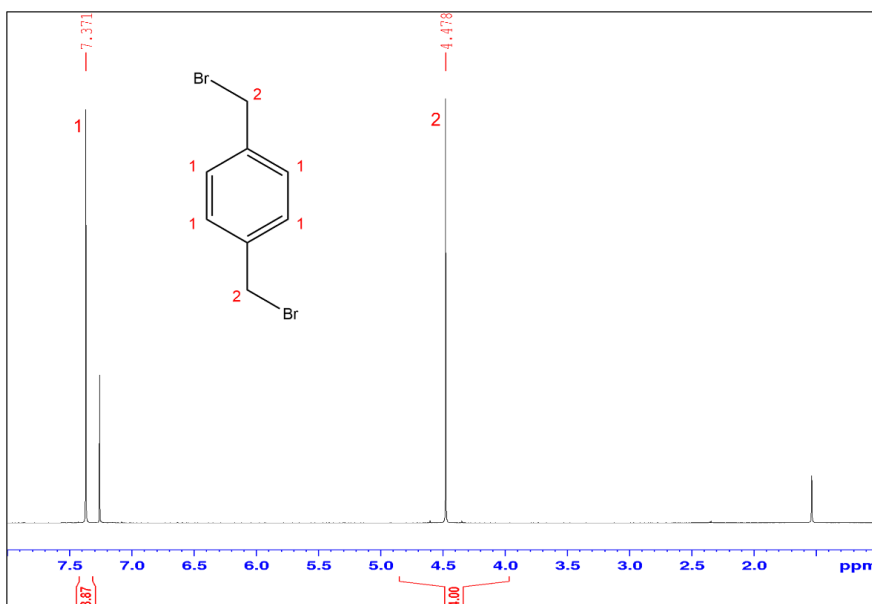

**1,4-Dibromo-2,5-dimethylbenzene (3b):**  $^1\text{H NMR}$  (400 MHz, 298 K,  $\text{CDCl}_3$ ):  $\delta$  7.39 (s, 2H), 2.33 (s, 6H) ppm.

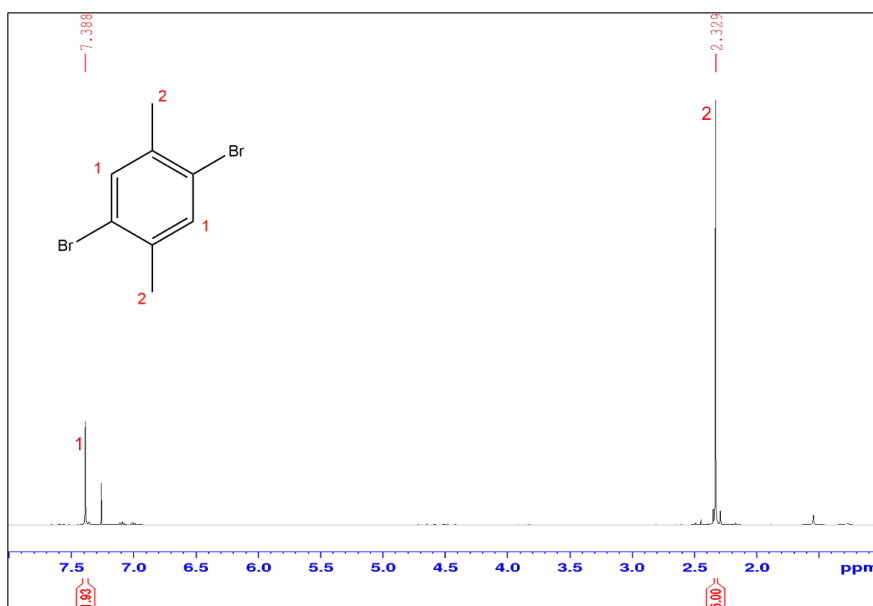

**1,4-Dibromo-2,5-bis(bromomethyl)benzene (3c):**  $^1\text{H NMR}$  (400 MHz, 298 K,  $\text{CDCl}_3$ ):  $\delta$  7.66 (s, 2H), 4.51 (s, 4H) ppm.

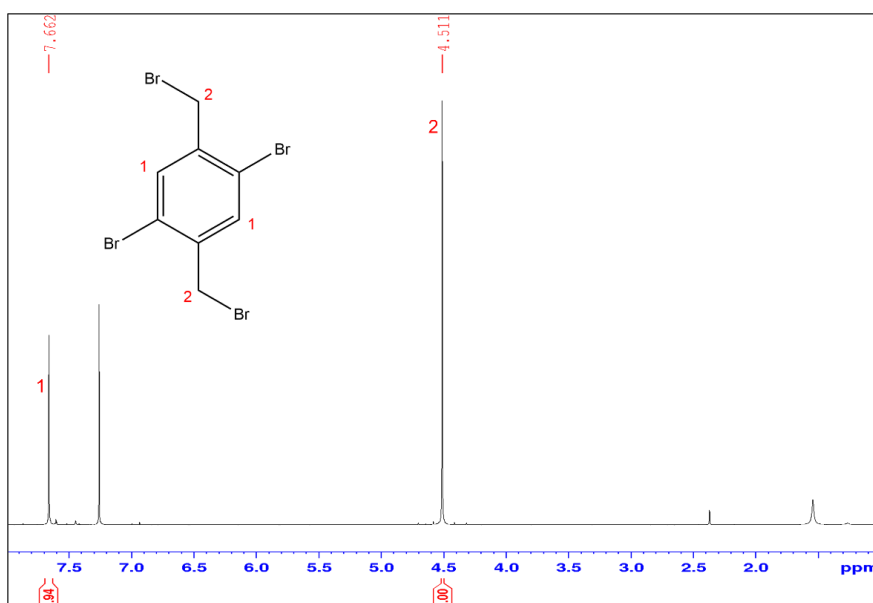

**1,3,5-Tris(bromomethyl)benzene (4a)** (after column chromatography):  $^1\text{H NMR}$  (400 MHz, 298 K,  $\text{CDCl}_3$ ):  $\delta$  7.35 (s, 3H), 4.45 (s, 6H) ppm.

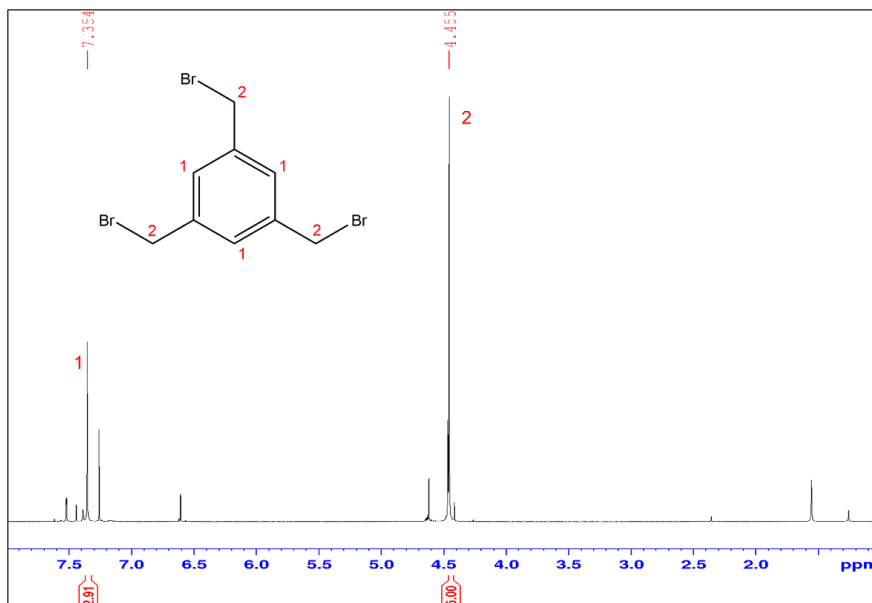

**1,3,5-Tribromo-2,4,6-trimethylbenzene (4b)**:  $^1\text{H NMR}$  (400 MHz, 298 K,  $\text{CDCl}_3$ ):  $\delta$  2.65 (s, 9H) ppm.

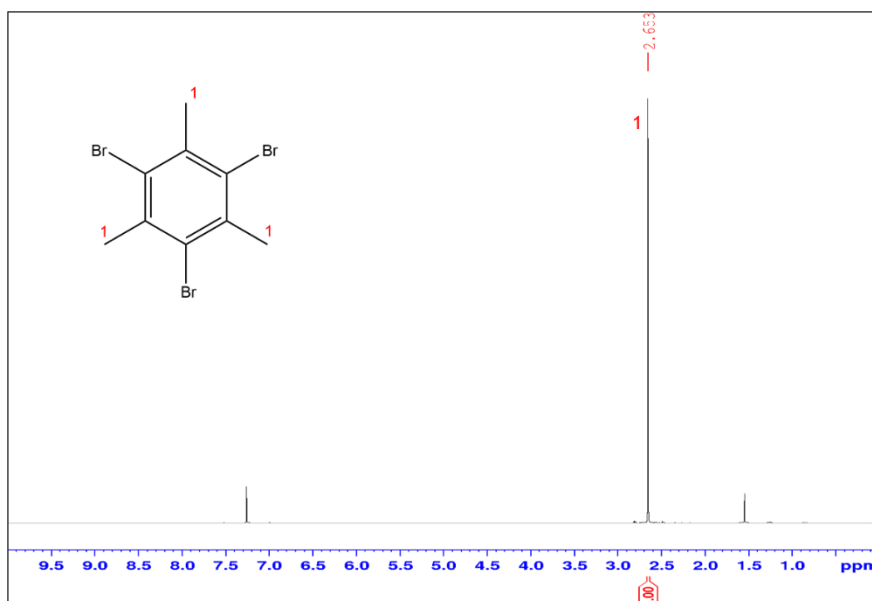



**1,3,5-Tribromo-2,4,6-tris(bromomethyl)benzene (4c):**  $^1\text{H}$  NMR (400 MHz, 298 K,  $\text{CDCl}_3$ ):  $\delta$  4.92 (s, 6H) ppm.

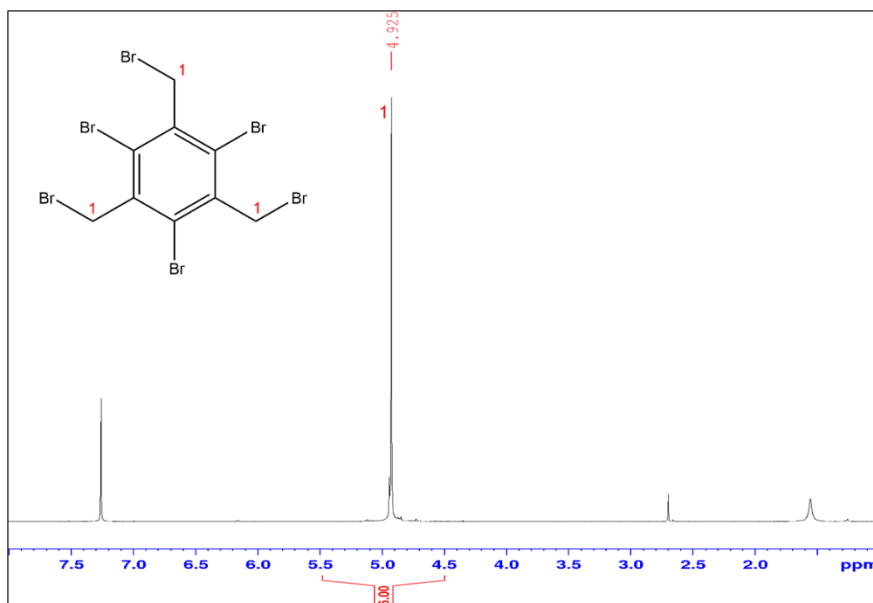

Supplement: Additional file 1 [file 1860-5397-20-95-S1.pdf]
